# Supplementary material for: Comprehensive Analysis of Prognosis and Immune Landscapes Based on Lipid-Metabolism- and Ferroptosis-Associated Signature in Uterine Corpus Endometrial Carcinoma
Source: MDPI journal article supplement (doi:10.3390/diagnostics13050870), 2023-02-24
Supplement: s1 [file s1]

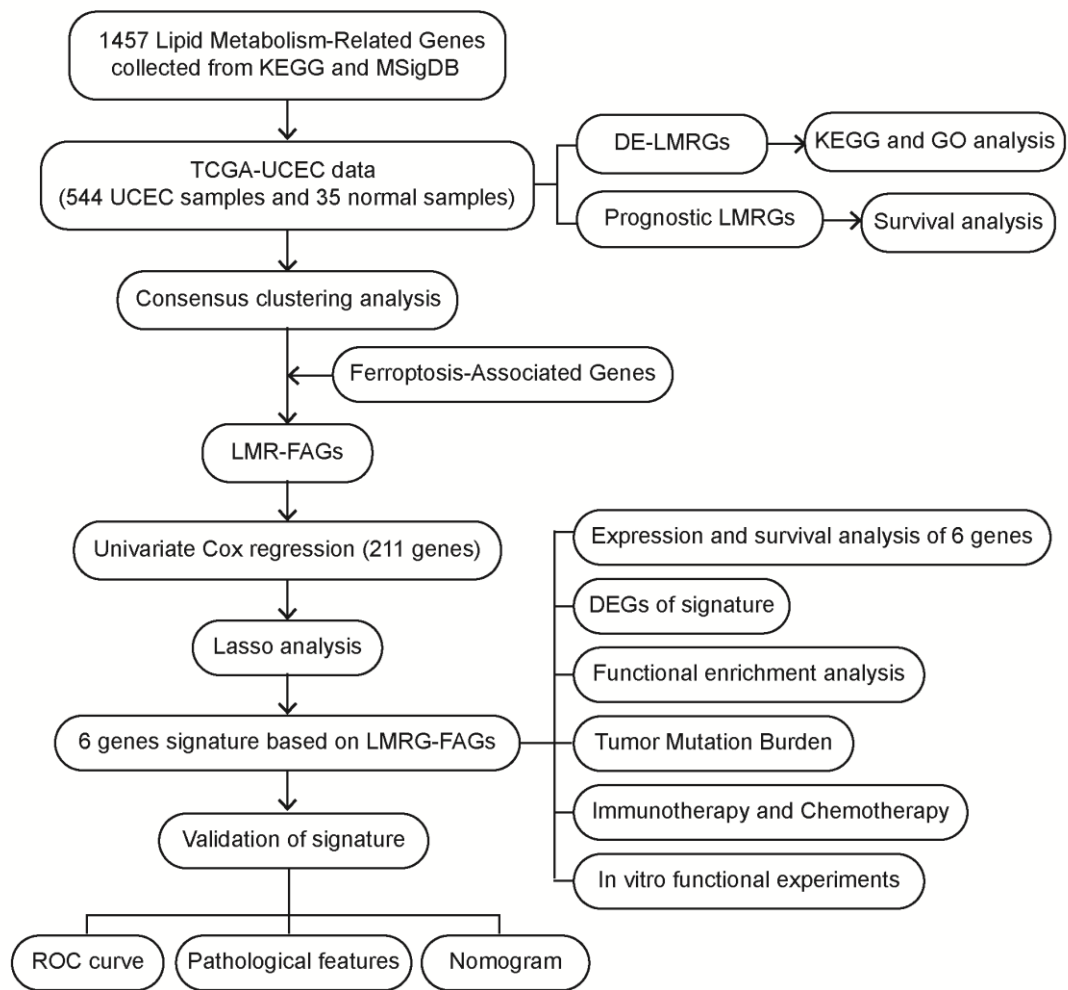

Figure S1. The brief workflow of this research.

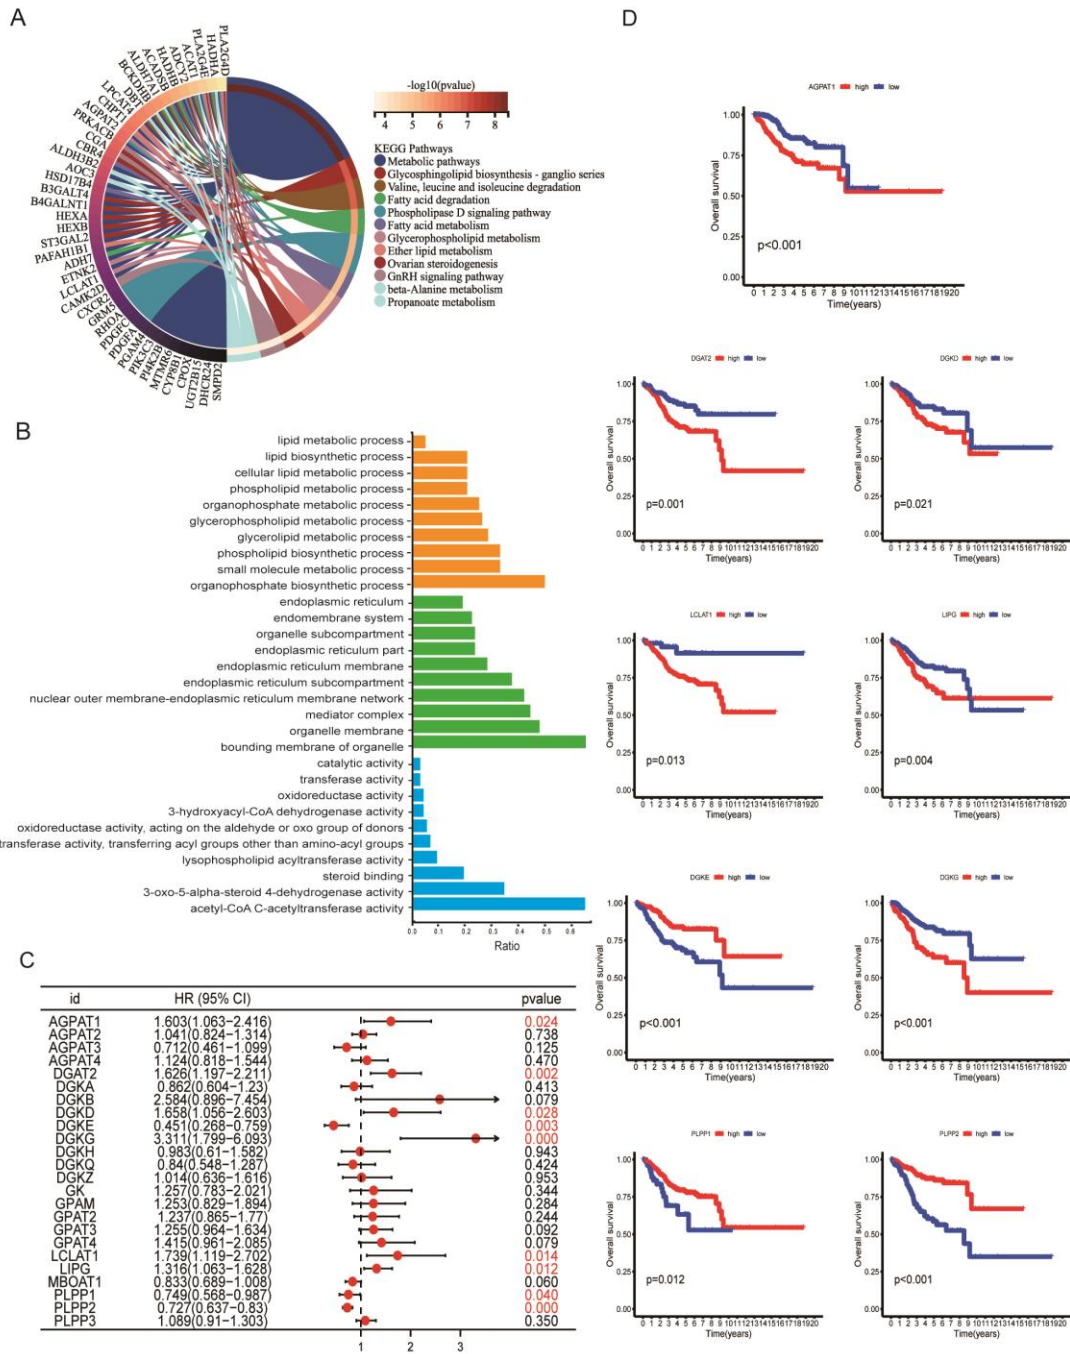

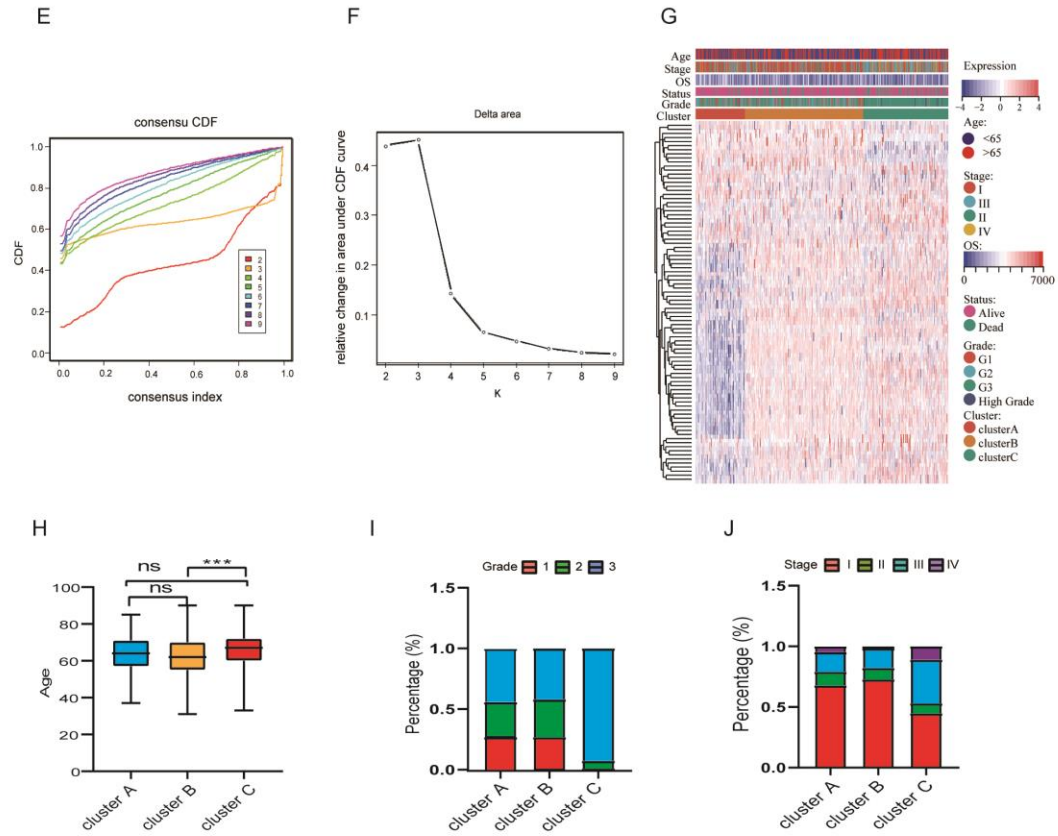

Figure S2. The univariate Cox and functional enrichment analysis of LMRGs in UCEC patients.

(A)-(B) The Kyoto encyclopedia of genes and genomes (KEGG) and Gene Ontology (GO) analysis of DE- LMRGs in UCEC. (C) The forest plot showed the univariate analysis of prognosis-related LMRGs. A hazard ratio $>1$  represents risk genes, and a Hazard ratio $<1$  represents protective genes.  $P<0.05$  is considered significant. (D) K-M analyses of 9 significant genes showed that high expression of AGPAT1, DGAT2, DGKD, DGKG, LCLAT1 and LIPG had a bad prognosis. DGKE, PLPP1 and PLPP2 was favorable genes, with prolonged survival after high expression. (E)-(F) Consensus clustering cumulative distribution function (CDF) and relative change in area under CDF curve for  $k = 2$  to  $9$ , which were utilized to indicate the stability of the cluster. (G) Heatmap of the expression distribution of 88 DE- LMRGs based on three clusters. (H)-(J) The clinical characteristics (Age, grade and stage) of the three clusters.

\* $P<0.05$ , \*\* $P<0.01$ , \*\*\* $P<0.001$

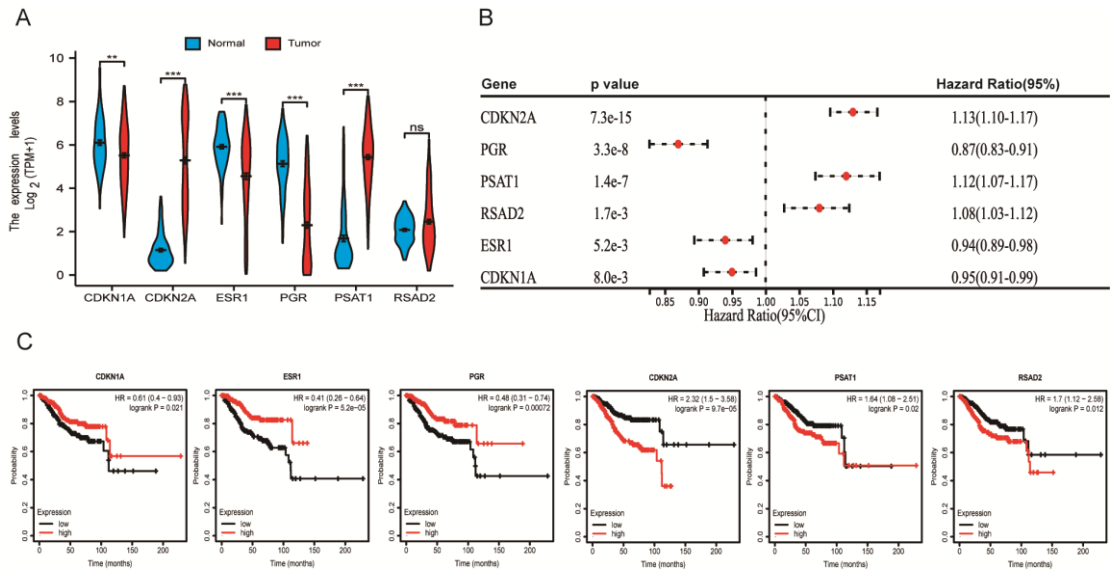

Figure S3. Lasso Cox regression analysis

(A) The expression level of 6 risk genes in UCEC patients of TCGA. (B) The univariate Cox of 6 risk genes ( $p < 0.05$ ). (C) The K-M survival analysis of six risk genes in UCEC patients.

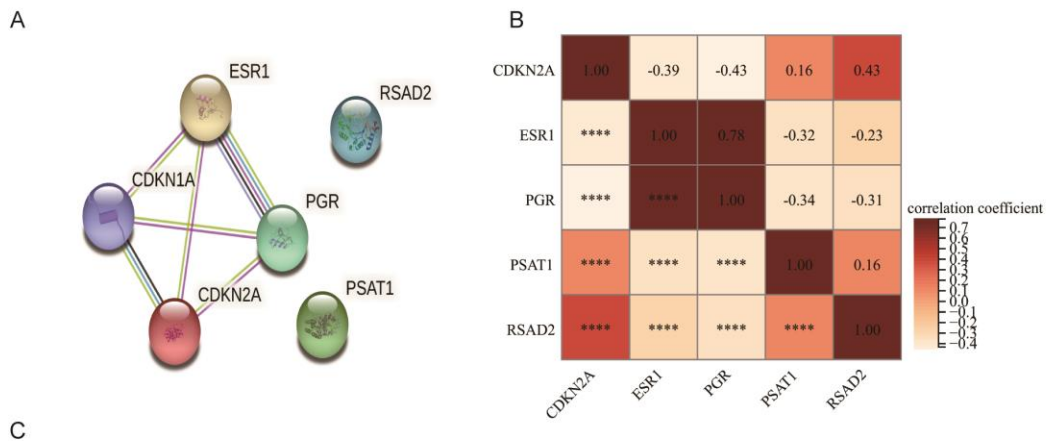

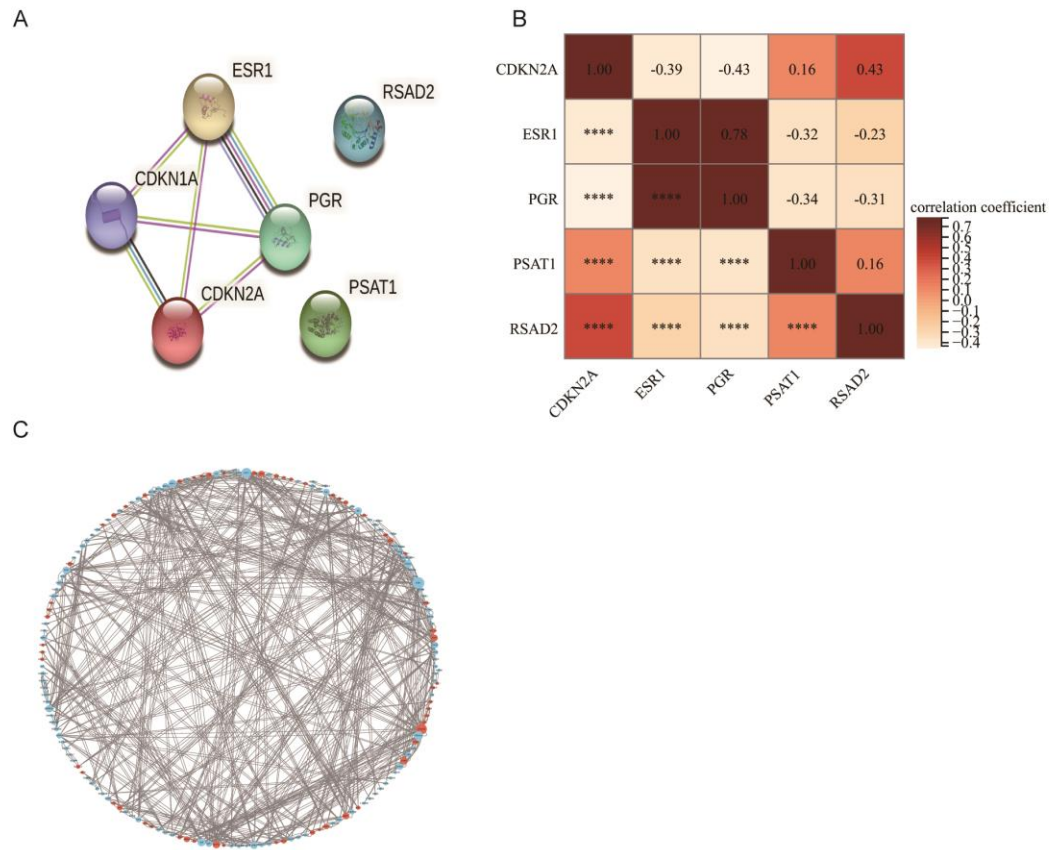

Figure S4. The network of signature.

(A) The protein-protein interaction (PPI) network of six risk genes. (B) The relationship analysis between the risk genes. (C) The PPI network of different genes based on the signature.

A

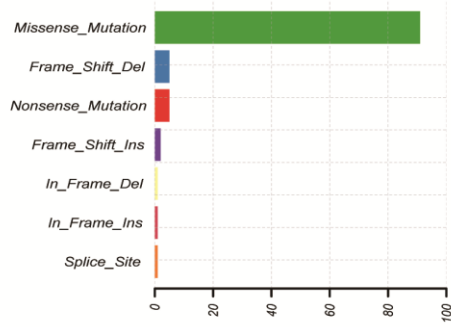

B

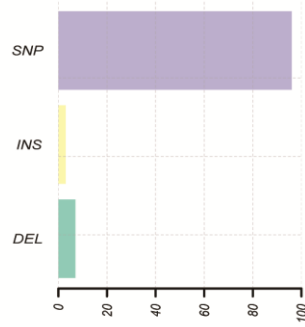

C

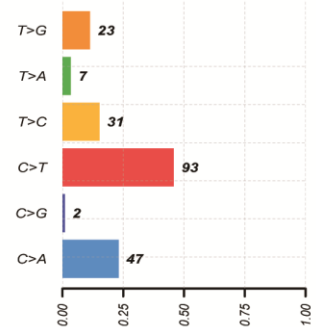

D

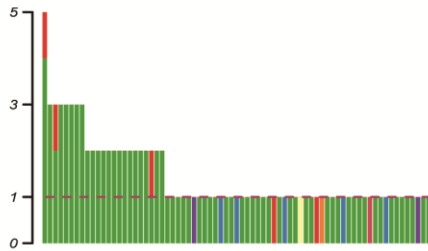

E

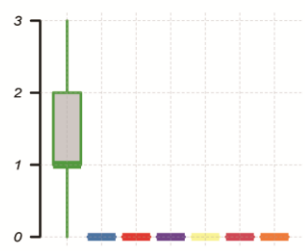

F

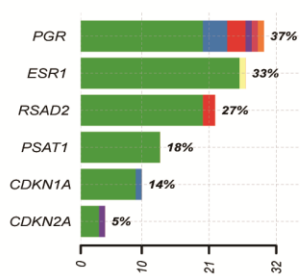

G

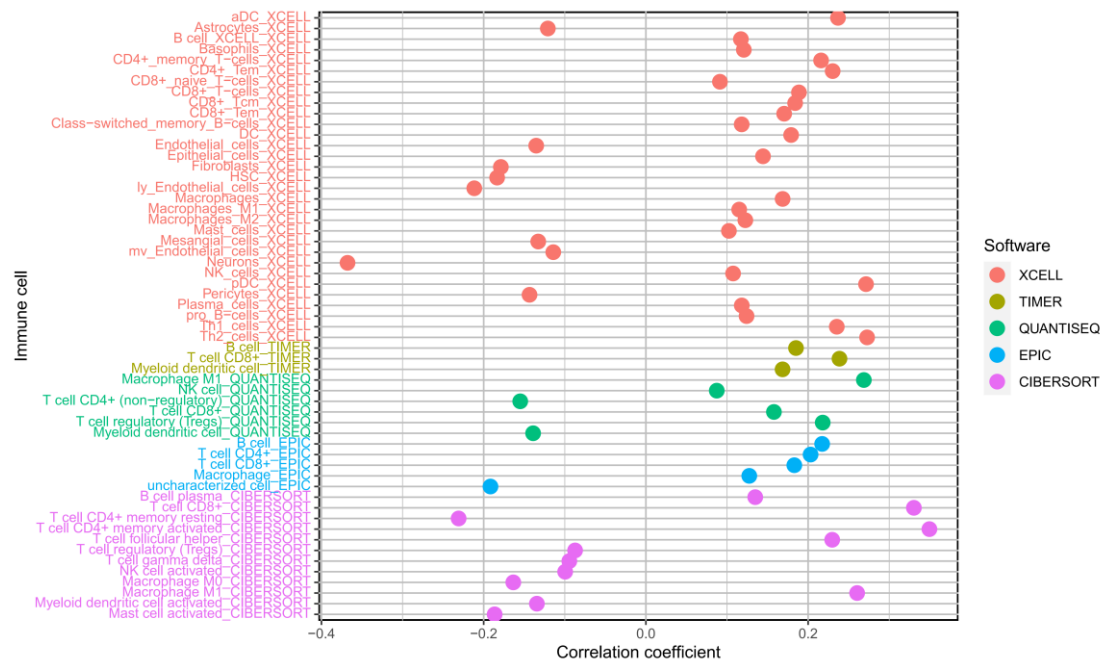



H

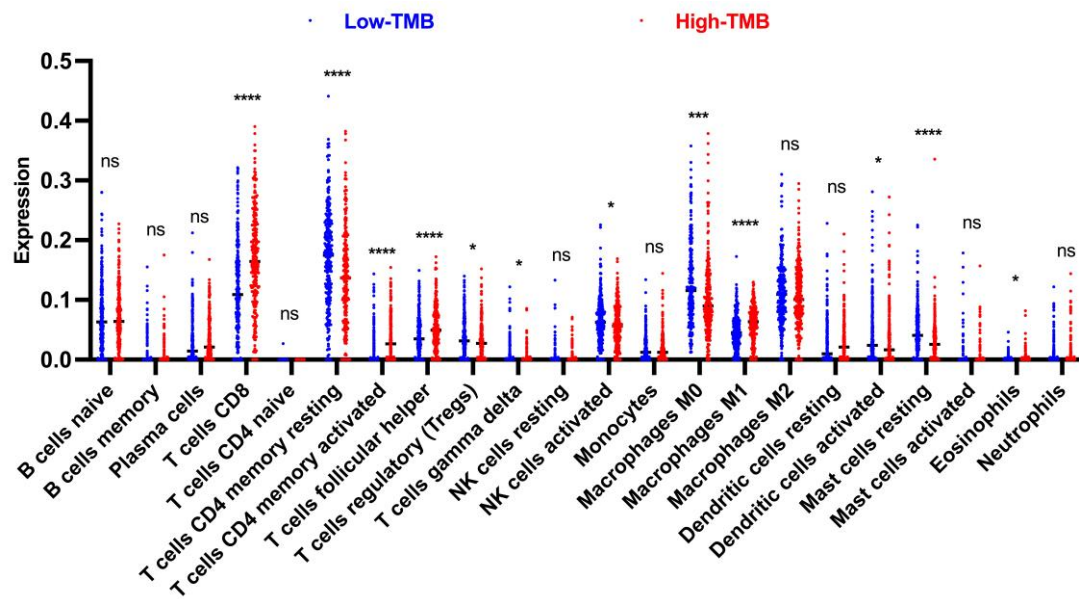

Figure S5. The detail of mutation information.

(A) The missense mutation accounts for the largest proportion in variant classification. (B) SNP occupied the most fraction in variant type. (C) C>T was the most frequent of SNV. (D)-(E) The number of altered bases in each sample and the mutation types in different colors. (F) The mutation of 6 risk genes in UCEC samples. (G) Bubble graphic demonstrates the correlation between TMB and immune cells. (H) The distribution of immune cells in high- and low-TMB group. ns  $P > 0.05$ , \*  $P < 0.05$ , \*\*  $P < 0.01$ , \*\*\*  $P < 0.001$ , \*\*\*\*  $P < 0.0001$ .





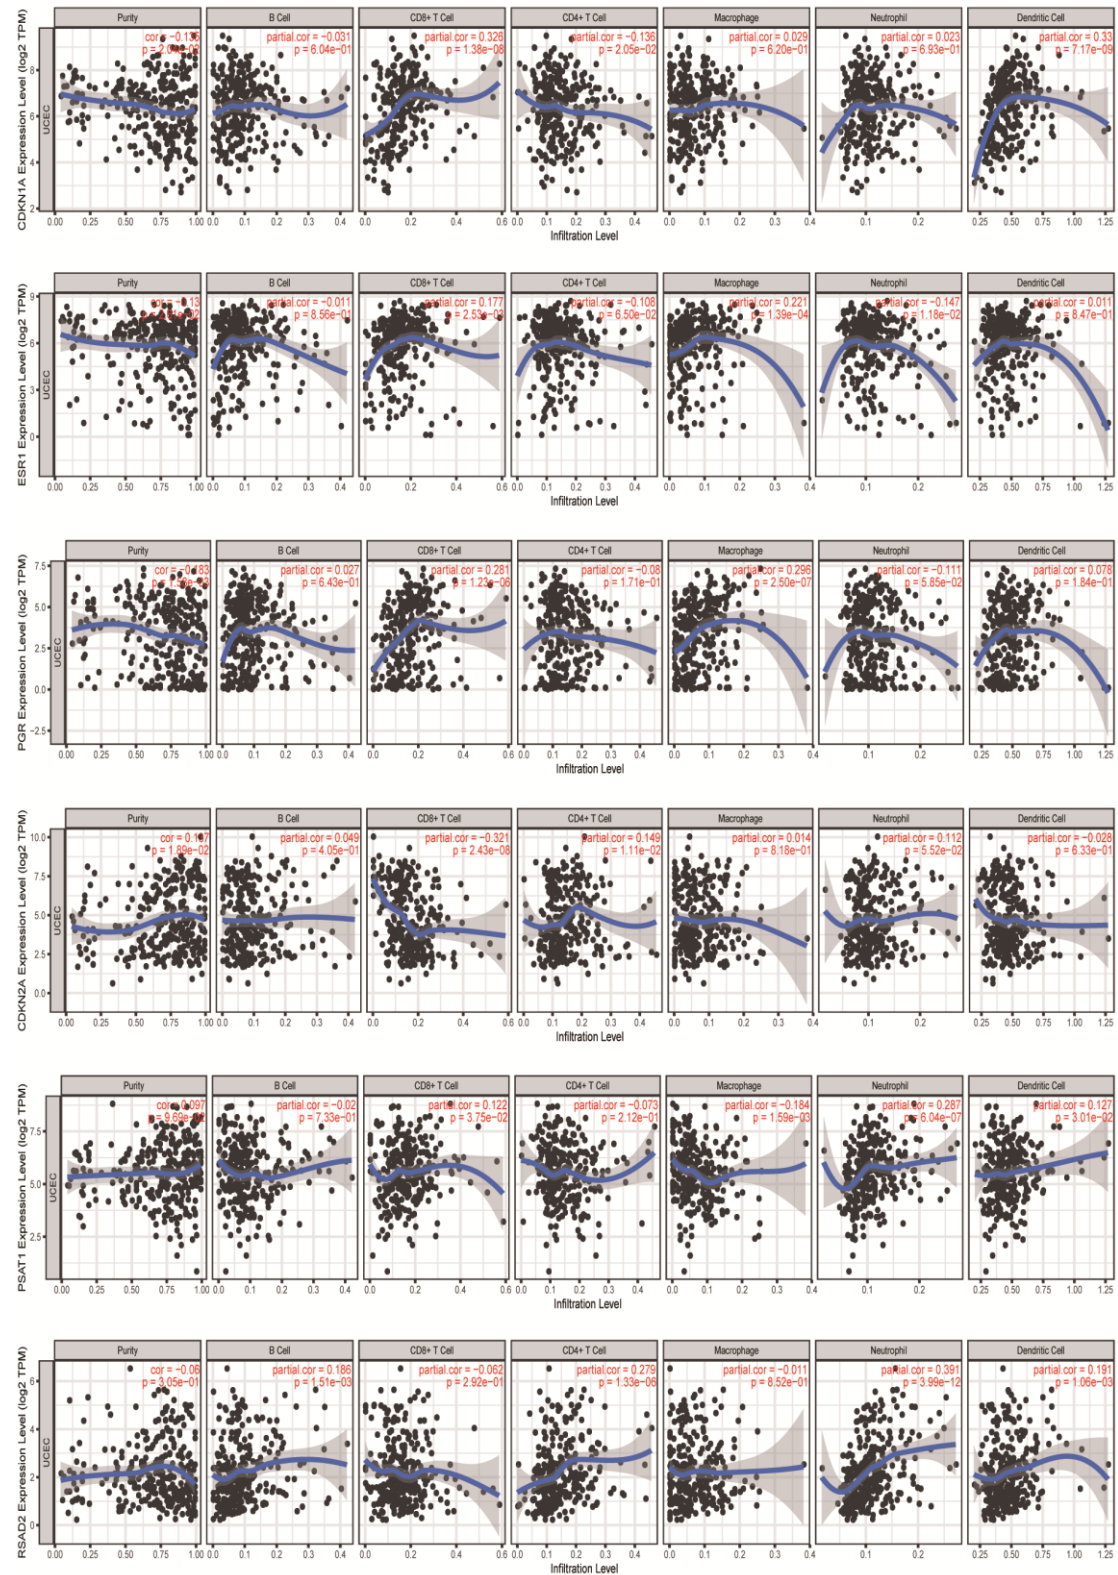

Figure S7. The relationship between the expression of six risk genes (log2 TPM) and immune infiltrating cells in UCEC patients by the TIMER database ( $P < 0.05$ ).

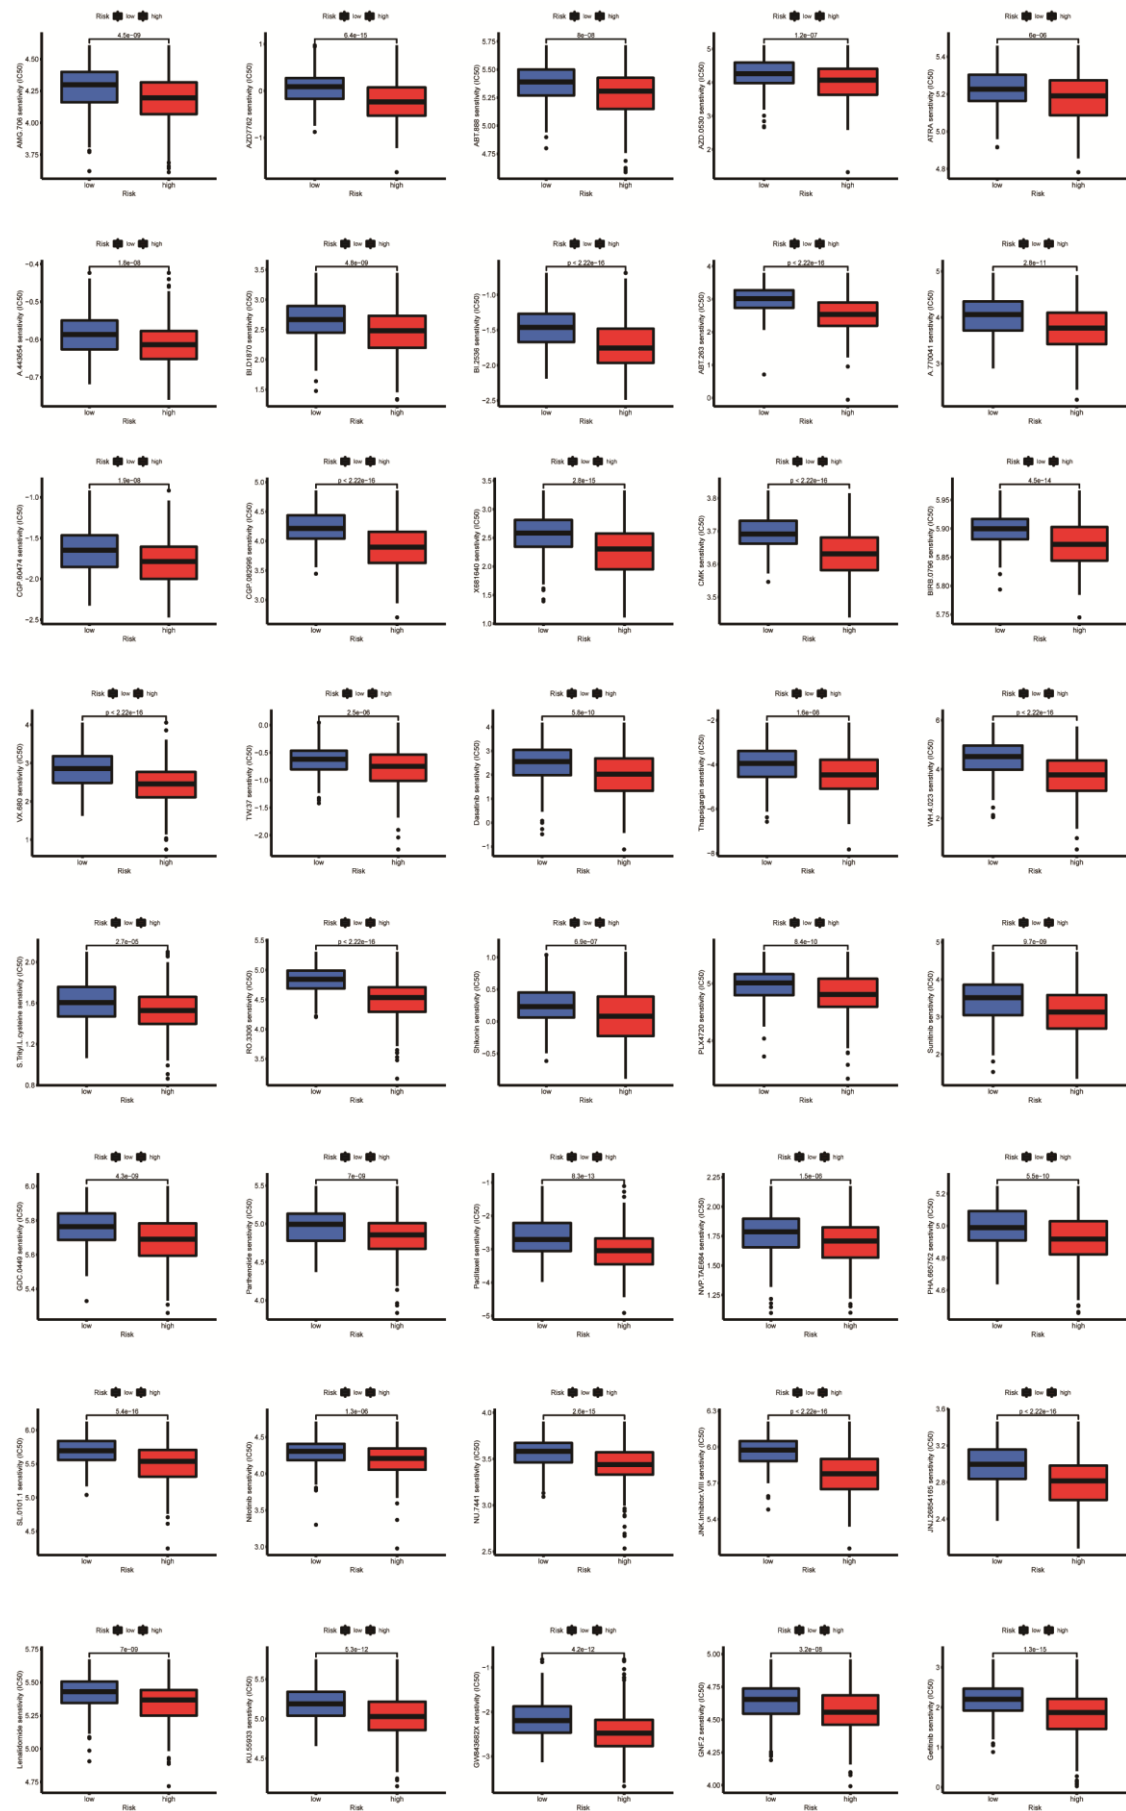

Figure S8. The half-maximal inhibitory concentration (IC<sub>50</sub>) values of potential chemotherapy agents and small molecule drugs were estimated by pRRophetic algorithm.

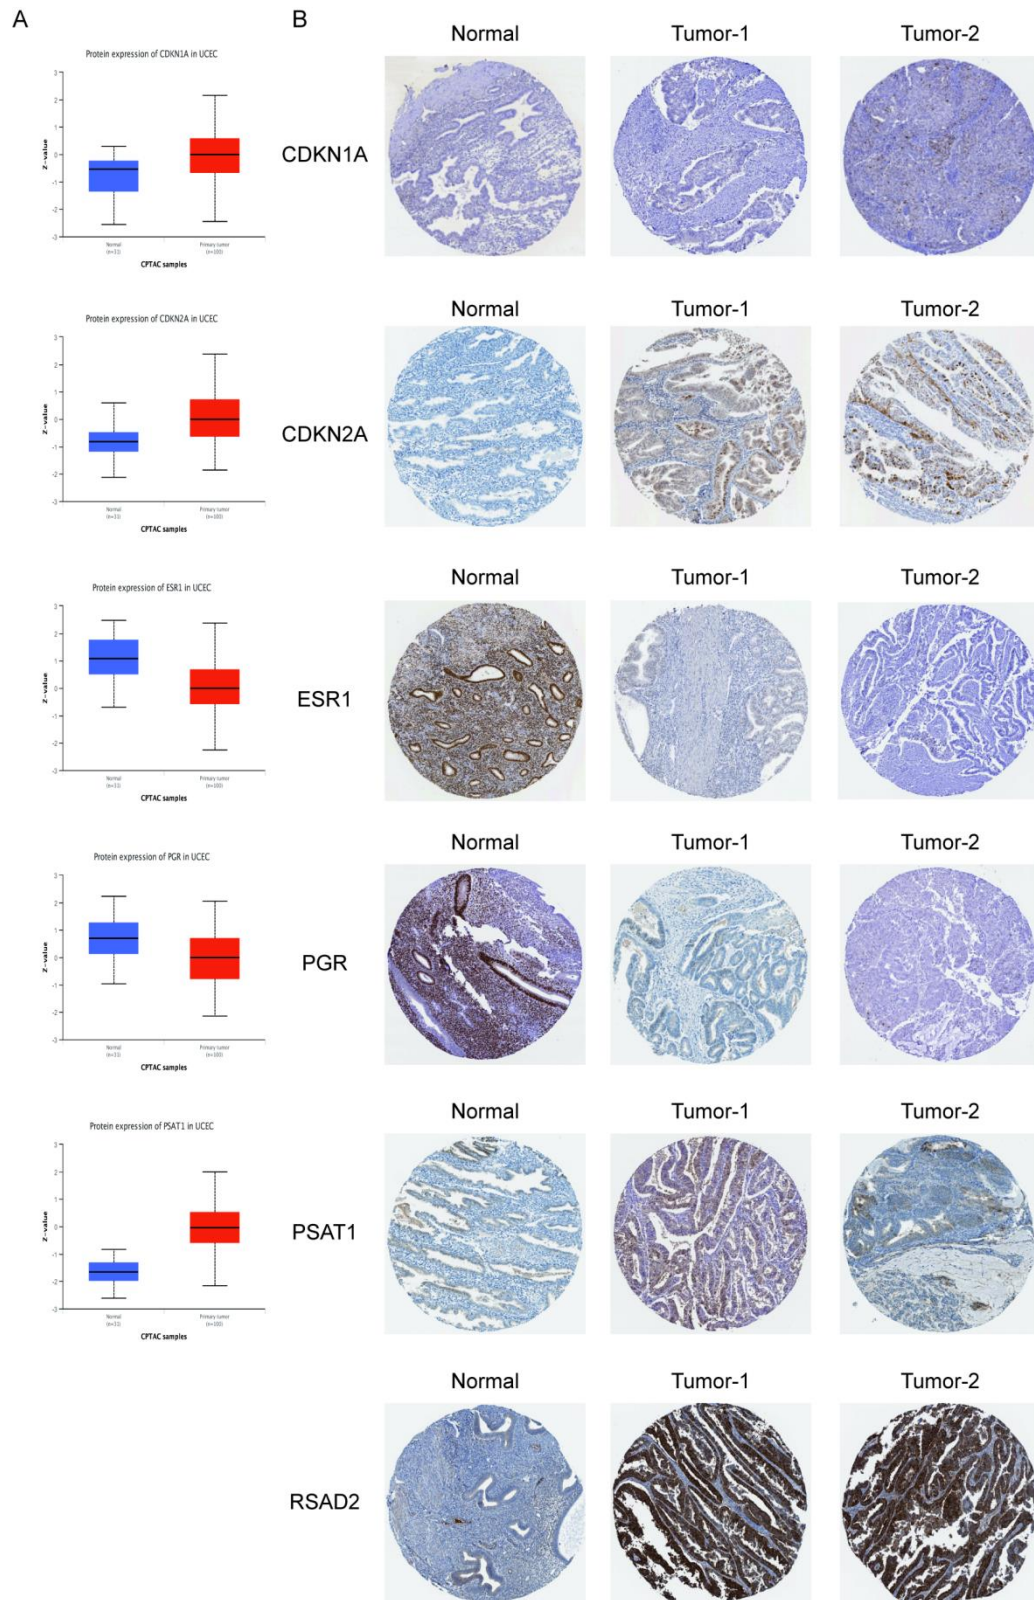

Figure S9. The protein expression of six risk genes  
**(A)** Clinical Proteomic Tumor Analysis Consortium (CPTAC) database was used to demonstrate the protein expression of six risk genes ( $P < 0.05$ , the result of RSAD2 was missing). **(B)** The expression of six risk genes between normal and UCEC tumor tissues was shown by HPA (Human Protein Atlas) database.
