# Supplementary material for: Comprehensive Analysis of Prognosis and Immune Landscapes Based on Lipid-Metabolism- and Ferroptosis-Associated Signature in Uterine Corpus Endometrial Carcinoma
Source: MDPI journal article supplement (doi:10.3390/diagnostics13050870), 2023-02-24
Supplement: s1 [file s1]

## Supplementary Tables

**Table S1.** Characteristics of patients with UCEC in the TCGA

| Characteristics        | No.(%)     |
|------------------------|------------|
| <b>Age</b>             |            |
| ≥ 65 years             | 308(56.6)  |
| < 65 years             | 236(43.4)  |
| <b>Survival Status</b> |            |
| Alive                  | 457(84.0)  |
| Dead                   | 87(16.0)   |
| <b>Stage</b>           |            |
| I                      | 340 (62.5) |
| II                     | 52(9.6)    |
| III                    | 123(22.6)  |
| IV                     | 29(5.3)    |
| <b>Grade</b>           |            |
| G1                     | 99(18.2)   |
| G2                     | 122(22.4)  |
| G3                     | 312(57.4)  |
| High Grade             | 11(2.0)    |

**Table S2.** The detailed lipid metabolism-related gene sets from the MsigDB and KEGG database.

| Database | Gene-set                                                                                                                                                                                                                                                                                                                                                                                                      |
|----------|---------------------------------------------------------------------------------------------------------------------------------------------------------------------------------------------------------------------------------------------------------------------------------------------------------------------------------------------------------------------------------------------------------------|
| GSEA     | KEGG_GLYCEROLIPID_METABOLISM<br>KEGG_GLYCEROPHOSPHOLIPID_METABOLISM<br>KEGG_SPHINGOLIPID_METABOLISM<br>KEGG_FATTY_ACID_METABOLISM<br>KEGG_STEROID_BIOSYNTHESIS<br>KEGG_STEROID_HORMONE_BIOSYNTHESIS<br>KEGG_ETHER_LIPID_METABOLISM<br>KEGG_GLYCOSPHINGOLIPID_BIOSYNTHESIS_LACTO_AND_NEOLACTO_SERIES<br>KEGG_GLYCOSPHINGOLIPID_BIOSYNTHESIS_GLOBO_SERIES<br>KEGG_GLYCOSPHINGOLIPID_BIOSYNTHESIS_GANGLIO_SERIES |
| HALLMARK | HALLMARK_CHOLESTEROL_HOMEOSTASIS<br>HALLMARK_ADIPOGENESIS<br>HALLMARK_FATTY_ACID_METABOLISM                                                                                                                                                                                                                                                                                                                   |
| REACTOME | REACTOME_METABOLISM_OF_LIPIDS<br>REACTOME_PHOSPHOLIPID_METABOLISM<br>REACTOME_GLYCOSPHINGOLIPID_METABOLISM                                                                                                                                                                                                                                                                                                    |

|      |                                                                                                                                                                                                                                                                                                                                                                                                                                                                                                                                                                                                                                                                                                                                                                                                                                                                                                                      |
|------|----------------------------------------------------------------------------------------------------------------------------------------------------------------------------------------------------------------------------------------------------------------------------------------------------------------------------------------------------------------------------------------------------------------------------------------------------------------------------------------------------------------------------------------------------------------------------------------------------------------------------------------------------------------------------------------------------------------------------------------------------------------------------------------------------------------------------------------------------------------------------------------------------------------------|
|      | <p> REACTOME_CHOLESTEROL_BIOSYNTHESIS<br/> REACTOME_FATTY_ACIDS<br/> REACTOME_TRANSCRIPTIONAL_REGULATION_OF_WHITE_ADIP<br/> OCYTE_DIFFERENTIATION<br/> REACTOME_REGULATION_OF_LIPID_METABOLISM_BY_PPARG<br/> PHA<br/> REACTOME_SPHINGOLIPID_METABOLISM<br/> REACTOME_FATTY_ACID_METABOLISM<br/> REACTOME_GLYCEROPHOSPHOLIPID_BIOSYNTHESIS </p>                                                                                                                                                                                                                                                                                                                                                                                                                                                                                                                                                                       |
| KEGG | <p> hsa00061 Fatty acid biosynthesis<br/> hsa00062 Fatty acid elongation<br/> hsa00071 Fatty acid degradation<br/> hsa00072 Synthesis and degradation of ketone bodies<br/> hsa00100 Steroid biosynthesis<br/> hsa00120 Primary bile acid biosynthesis<br/> hsa00140 Steroid hormone biosynthesis<br/> hsa00561 Glycerolipid metabolism<br/> hsa00564 Glycerophospholipid metabolism<br/> hsa00565 Ether lipid metabolism<br/> hsa00590 Arachidonic acid metabolism<br/> hsa00591 Linoleic acid metabolism<br/> hsa00592 alpha-Linolenic acid metabolism<br/> hsa00600 Sphingolipid metabolism<br/> hsa01040 Biosynthesis of unsaturated fatty acids<br/> hsa04979 Cholesterol metabolism<br/> hsa00260 Glycine, serine and threonine metabolism<br/> hsa04146 Peroxisome<br/> hsa04925 Cholinergic synapse<br/> hsa04923 Regulation of lipolysis in adipocytes<br/> hsa04072 Phospholipase D signaling pathway </p> |
|      | Sum lipid metabolism-related gene: 1457                                                                                                                                                                                                                                                                                                                                                                                                                                                                                                                                                                                                                                                                                                                                                                                                                                                                              |

**Table S3.** The list of Lipid Metabolism-Related Genes

| The list of Lipid Metabolism-Related Genes |        |        |       |       |       |             |       |        |
|--------------------------------------------|--------|--------|-------|-------|-------|-------------|-------|--------|
| 1                                          | MBOAT2 | UGT1A9 | JAGN1 | SMS   | GBA2  | PLEKHA<br>4 | PEDS1 | IDH2   |
| 2                                          | GPAM   | UGT1A8 | EPHX2 | CBR3  | GC    | PLEKHA<br>5 | EGFR  | ATP2B1 |
| 3                                          | DGKZ   | UGT1A7 | IDH3G | NTHL1 | GDE1  | PLEKHA<br>6 | PEX7  | PAOX   |
| 4                                          | DGKE   | UGT1A6 | GPX3  | AADAT | GDPD1 | PLEKHA      | ADCY1 | ATP2B3 |

|    |          |          |             |               |          |              |                  |        |
|----|----------|----------|-------------|---------------|----------|--------------|------------------|--------|
|    |          |          |             |               |          | 8            |                  |        |
| 5  | DGKD     | UGT1A5   | ELMOD<br>3  | HSPH1         | GDPD3    | PLIN1        | PLCB4            | ATP2B4 |
| 6  | DGKH     | UGT1A4   | ORM1        | APEX1         | GDPD5    | PLIN3        | BPGM             | ATP2B2 |
| 7  | MBOAT1   | UGT1A3   | RETSAT      | ACSS1         | GGPS1    | PLPP6        | PEDS1-UB<br>E2V1 | HAO1   |
| 8  | AGPAT3   | UGT1A10  | ESRRA       | ENO3          | GGT1     | PNPLA2       | PDGFRA           | RAF1   |
| 9  | AGPAT4   | UGT1A1   | HIBCH       | LGALS1        | GGT5     | PNPLA4       | PEX5             | MAP2K1 |
| 10 | DGKQ     | SULT2B1  | SUCLG1      | METAP1        | GK3P     | PNPLA5       | ADCY2            | PRDX5  |
| 11 | DGKB     | SULT1E1  | STAT5A      | ACSM3         | GLB1L    | PNPLA6       | ITPR1            | MC2R   |
| 12 | DGKG     | STS      | ITGA7       | D2HGDH        | GLIPR1   | PNPLA7       | LPA              | MAP2K2 |
| 13 | DGKA     | SRD5A3   | MRAP        | ADSL          | GLTP     | PNPLA8       | PHGDH            | MAPK1  |
| 14 | PLPP3    | SRD5A2   | PLIN2       | SUCLA2        | GM2A     | POMC         | PDGFRB           | SOD2   |
| 15 | DGKI     | SRD5A1   | CYC1        | SDHA          | GPCPD1   | PON1         | PEX5L            | MAPK3  |
| 16 | LCLAT1   | HSD3B2   | RNF11       | XIST          | GPS2     | PON2         | ADCY3            | NOS2   |
| 17 | GPAT3    | HSD3B1   | ALDOA       | OSTC          | GPX1     | PON3         | ITPR2            | PRDX1  |
| 18 | GPAT4    | HSD17B8  | SULT1A<br>1 | GLUL          | GPX2     | PPARD        | PSAT1            | GSTK1  |
| 19 | PLPP1    | HSD17B6  | DDT         | GABARAP<br>L1 | GRHL1    | PPARGC<br>1A | KIT              | XDH    |
| 20 | PLPP2    | HSD17B3  | SDHB        | AQP7          | GSTM4    | PPARGC<br>1B | ADCY4            | DHRS4  |
| 21 | AGPAT1   | HSD17B2  | CD151       | PRDX6         | HACD1    | PPM1L        | ITPR3            | NR4A2  |
| 22 | AGPAT2   | HSD17B12 | SLC27A<br>1 | ERP29         | HACD2    | PPP1CA       | PSPH             | NR4A1  |
| 23 | GPAT2    | HSD17B1  | BCKDH<br>A  | H2AZ1         | HACD3    | PPP1CB       | INSR             | F2     |
| 24 | LIPG     | HSD11B2  | C3          | GAPDHS        | HACD4    | PPP1CC       | PEX13            | AVP    |
| 25 | GK       | HSD11B1  | LEP         | GAD2          | HACL1    | PPT1         | ADCY5            | CXCL8  |
| 26 | DGAT2    | CYP7B1   | ADCY6       | PTPRG         | HDAC3    | PPT2         | PRKCA            | PDE2A  |
| 27 | GK2      | CYP7A1   | ELOVL6      | IL4I1         | HELZ2    | PRKAA2       | NCEH1            | F2R    |
| 28 | GLA      | CYP3A7   | LTC4S       | TP53INP2      | HILPDA   | PRKAB2       | GCAT             | GRM1   |
| 29 | ALDH7A1  | CYP3A5   | SPARCL<br>1 | PDHA1         | HMGCLL1  | PRKACA       | GRB2             | GRM2   |
| 30 | AGK      | CYP3A43  | RMDN3       | RAP1GDS1      | HPGDS    | PRKACB       | PEX12            | GRM3   |
| 31 | TKFC     | CYP3A4   | MTCH2       | BLVRA         | HSD17B13 | PRKACG       | PRKCB            | GRM4   |
| 32 | AWAT2    | CYP21A2  | SOWAH<br>C  | SERINC1       | HSD17B14 | PRKAG2       | GAB1             | GRM5   |
| 33 | AKR1B1   | CYP1B1   | SLC1A5      | BMPR1B        | HSD3B7   | PRKD1        | PEX10            | GRM6   |
| 34 | PNLIPRP2 | CYP1A1   | CMPK1       | RDH11         | HTD2     | PRKD2        | ADCY7            | GRM7   |
| 35 | PNLIPRP1 | CYP19A1  | REEP6       | ENO2          | IDI2     | PRKD3        | PRKCG            | GRM8   |
| 36 | PNLIP    | CYP17A1  | NDUFA5      | AACS          | INPP4A   | PRXL2B       | ALAS2            | AVPR1B |
| 37 | DGAT1    | CYP11B2  | FZD4        | ABCB11        | INPP4B   | PSAP         | GAB2             | AVPR2  |

|    |                   |          |             |        |              |              |          |             |
|----|-------------------|----------|-------------|--------|--------------|--------------|----------|-------------|
| 38 | GLYCTK            | CYP11B1  | DRAM2       | ABCB4  | INPP5D       | PTEN         | PEX2     | LPAR1       |
| 39 | LPL               | CYP11A1  | MGST3       | ABCC1  | INPP5E       | PTGDS        | ADCY8    | LPAR2       |
| 40 | ALDH1B1           | COMT     | ATP1B3      | ABCC3  | INPP5F       | PTGES        | PRKCE    | LPAR3       |
| 41 | ALDH2             | AKR1D1   | RETN        | ABCD1  | INPP5J       | PTGES2       | APOC1    | LPAR4       |
| 42 | AKR1A1            | AKR1C4   | STOM        | ABHD3  | INPP5K       | PTGES3       | MAOB     | LPAR5       |
| 43 | LIPC              | AKR1C3   | ESYT1       | ABHD4  | INPPL1       | PTGIS        | SHC1     | LPAR6       |
| 44 | MGLL              | AKR1C2   | GHITM       | ABHD5  | INSIG1       | PTGR1        | PXMP2    | PTGFR       |
| 45 | ALDH9A1           | AKR1C1   | DNAJC1<br>5 | ACACA  | INSIG2       | PTGR2        | ADCY9    | CXCR1       |
| 46 | ALDH3A2           | AGPS     | GADD45<br>A | ACACB  | KPNB1        | PTGS1        | APOC2    | CXCR2       |
| 47 | PNPLA3            | ENPP2    | VEGFB       | ACAD10 | LBR          | PTGS2        | SHC2     | G12         |
| 48 | CEL               | ENPP6    | PFKL        | ACAD11 | LHB          | PTPMT1       | MPV17    | PTK2B       |
| 49 | LIPF              | PAFAH1B1 | COQ3        | ACBD4  | LIPH         | PTPN13       | APOH     | G13         |
| 50 | PEMT              | PAFAH1B2 | NABP1       | ACBD5  | LIPI         | RAB14        |          | CYTH3       |
| 51 | PLA2G15           | PAFAH1B3 | CYP4B1      | ACBD6  | LPIN1        | RAB4A        | HSD11B1L | CYTH4       |
| 52 | GPD1L             | PAFAH2   | PPM1B       | ACBD7  | LPIN2        | RAB5A        | SHC3     | CYTH2       |
| 53 | LPGAT1            | PLA2G7   | ARAF        | ACOT1  | LPIN3        | RAN          | MPV17L2  | CYTH1       |
| 54 | MBOAT7            | B3GNT4   | CAVIN1      | ACOT11 | LRP2         | RGL1         | ANGPTL3  | RAPGEF3     |
| 55 | PCYT1A            | B3GNT2   | COL4A1      | ACOT12 | LTA4H        | RORA         | AOC2     | RAPGEF4     |
| 56 | PLA2G2A           | ST3GAL6  | IMMT        | ACOT13 | MAPKAPK<br>2 | RUFY1        | SHC4     | DNM1        |
| 57 | PLA2G4A           | B4GALT1  | DHRS7       | ACOT4  | MBTPS1       | RXRA         | MPV17L   | DNM3        |
| 58 | PLA2G5            | B3GNT5   | COL15A<br>1 | ACOT6  | MBTPS2       | RXRB         | CREB1    | DNM2        |
| 59 | PLA2G4B           | FUT9     | NMT1        | ACOT7  | MCAT         | SACM1L       | PTPN11   | UGT2B11     |
| 60 | PTDSS2            | FUT7     | COQ5        | ACOT9  | MECR         | SAMD8        | PXMP4    | UGT2B10     |
| 61 | PCYT2             | FUT6     | LAMA4       | ACOX2  | MED1         | SAR1B        | NPPA     | UGT2A3      |
| 62 | CDS1              | FUT5     | BAZ2A       | ACOXL  | MED10        | SBF1         | ATF2     | UGT2A1      |
| 63 | PGS1              | FUT4     | IDH3A       | ACP6   | MED11        | SBF2         | ANGPTL8  | FAH         |
| 64 | CDIPT             | FUT3     | LIFR        | ACSBG1 | MED12        | SCAP         | AMT      | UBE2L6      |
| 65 | CDS2              | FUT2     | PREB        | ACSBG2 | MED13        | SCD5         | SOS1     | FHL2        |
| 66 | GPD1              | FUT1     | PTGER3      | ACSF2  | MED13L       | SEC23A       | NPR1     | PLD6        |
| 67 | CHAT              | B4GAT1   | GPHN        | ACSF3  | MED14        | SEC24A       | ATF4     | PLCB3       |
| 68 | LPCAT1            | GCNT2    | PFKFB3      | ACSM6  | MED15        | SEC24B       | SOS2     | CAMK2B      |
| 69 | PTDSS1            | B3GNT3   | GPX4        | ACSS3  | MED16        | SEC24C       | PEX11B   | ACLY        |
| 70 | ACHE              | B3GALT5  | SSPN        | AGMO   | MED17        | SEC24D       | PRKG1    | MIF         |
| 71 | PLA2G3            | ABO      | SQOR        | AGPAT5 | MED18        | SELENOI      | CREB3    | FIG4        |
| 72 | ETNK1             | B4GALT3  | MTARC<br>2  | AGT    | MED19        | SERPINA<br>6 | SORT1    | PLEKHA<br>1 |
| 73 | JMJD7-PL<br>A2G4B | B4GALT2  | DLD         | AHR    | MED20        | SIN3A        | GCSH     | CETP        |
| 74 | CHPT1             | ST3GAL4  | ITIH5       | AHRR   | MED21        | SIN3B        | HRAS     | DDO         |

|     |              |                |              |         |         |              |         |             |
|-----|--------------|----------------|--------------|---------|---------|--------------|---------|-------------|
| 75  | PLA2G6       | B4GALT4        | CD302        | AKR1B15 | MED22   | SLC10A1      | PEX11G  | IFNGR1      |
| 76  | PLA2G2E      | ST3GAL3        | ATL2         | ALAS1   | MED23   | SLC10A2      | PRKG2   | SUCLG2      |
| 77  | PLA2G10      | B3GALT2        | TKT          | ALB     | MED24   | SLC25A1<br>7 | CREB3L1 | FITM1       |
| 78  | LPCAT3       | B3GALT1        | UQCRC1       | ALDH3B1 | MED25   | SLC25A2<br>0 | APOB    | PLEKHA<br>2 |
| 79  | ETNK2        | ST8SIA1        | CAT          | ALDH3B2 | MED26   | SLC27A2      | DAO     | PGAM4       |
| 80  | PLA2G12B     | A4GALT         | OMD          | ALOX12  | MED27   | SLC27A3      | PLPP5   | CAMK2G      |
| 81  | PLA2G2F      | ST3GAL2        | DLAT         | ALOX12B | MED28   | SLC27A5      | KRAS    | SLC5A6      |
| 82  | LYPLA1       | GBGT1          | MRPL15       | ALOX15  | MED29   | SLC44A1      | CREB3L2 | CPOX        |
| 83  | PLA2G1B      | ST3GAL1        | RIOK3        | ALOX15B | MED30   | SLC44A2      | PCSK9   | FITM2       |
| 84  | ADPRM        | HEXB           | RTN3         | ALOX5   | MED31   | SLC44A3      | AGXT2   | PLEKHA<br>3 |
| 85  | PHOSPHO<br>1 | NAGA           | CHUK         | ALOX5AP | MED4    | SLC44A4      | PLPP4   | AKR1B10     |
| 86  | TAFAZZIN     | B3GALNT1       | G3BP2        | ALOXE3  | MED6    | SLC44A5      | NRAS    | CAMK4       |
| 87  | GNPAT        | HEXA           | SDHC         | ALPI    | MED7    | SLC51A       | CREB3L3 | UGT2B4      |
| 88  | LPCAT4       | ST6GALNA<br>C4 | SAMM5<br>0   | AMACR   | MED8    | SLC51B       | LDLRAP1 | UGT2B28     |
| 89  | PLA2G4E      | ST6GALNA<br>C3 | ARL4A        | ANKRD1  | MED9    | SLCO1A2      | GATM    | UGT2B17     |
| 90  | CHKA         | ST6GALNA<br>C6 | SNCG         | APOA1   | MFSD2A  | SLCO1B1      | MRAS    | UGT2B15     |
| 91  | LYPLA2       | B4GALNT1       | PDCD4        | APOA2   | MID1IP1 | SLCO1B3      | CREB3L4 | UQCR10      |
| 92  | PLA2G2C      | ST6GALNA<br>C5 | COQ9         | APOA5   | MIGA1   | SMARCD<br>3  | MYLIP   | FMO1        |
| 93  | PLA2G2D      | SLC33A1        | APLP2        | ARF1    | MMAA    | SP1          | GAMT    | FAR2        |
| 94  | LPCAT2       | ST3GAL5        | SOD1         | ARF3    | MMUT    | SPNS2        | RRAS    | PLB1        |
| 95  | PLA2G12A     | B3GALT4        | PTCD3        | ARNT    | MOGAT1  | SPTLC3       | CREB5   | PGAM2       |
| 96  | PLD1         | ST8SIA5        | PHLDB1       | ARNT2   | MOGAT2  | SPTSSA       | CHDH    | LRTOMT      |
| 97  | CHKB         | FDPS           | HSPB8        | ARNTL   | MOGAT3  | SPTSSB       | RRAS2   | TANK        |
| 98  | PISD         | IDI1           | AIFM1        | ARSB    | MORC2   | SREBF1       | ATF6B   | AOC3        |
| 99  | PLD2         | HMGCS1         | CCNG2        | ARSD    | MTF1    | STAR         | LRP1    | FDX1        |
| 100 | PCYT1B       | MVD            | PPP1R15<br>B | ARSF    | MTM1    | STARD10      | DHRS11  | PLBD1       |
| 101 | LCAT         | LDLR           | MDH2         | ARSG    | MTMR1   | STARD3       | RALGDS  | INS         |
| 102 | CRLS1        | ALDOC          | ABCA1        | ARSH    | MTMR10  | STARD3<br>NL | ATF1    | CAMK1       |
| 103 | GPD2         | SCD            | COX7B        | ARSI    | MTMR12  | STARD5       | BHMT    | ANGPTL<br>4 |
| 104 | GAL3ST1      | PMVK           | MYLK         | ARSJ    | MTMR14  | STARD6       | RALA    | UROD        |
| 105 | SGPP2        | MVK            | COX8A        | ARSK    | MTMR2   | STARD7       | DAGLA   | FDX2        |
| 106 | GLB1         | FADS2          | DHRS7B       | ARSL    | MTMR3   | SULT2A1      | LRPAP1  | PLD3        |

|     |         |               |              |         |         |               |                     |             |
|-----|---------|---------------|--------------|---------|---------|---------------|---------------------|-------------|
| 107 | GALC    | HMGCR         | MIGA2        | ARV1    | MTMR4   | SUMF1         | DMGDH               | PEX26       |
| 108 | SGMS2   | ANXA13        | ITSN1        | AWAT1   | MTMR6   | SUMF2         | RALB                | CAMK2A      |
| 109 | GBA     | SREBF2        | RREB1        | BAAT    | MTMR7   | SUMO2         | AQP7B               | ACO2        |
| 110 | SPHK2   | ACSS2         | CMBL         | BCHE    | MTMR8   | SYNJ1         | DAGLB               | KMT5A       |
| 111 | NEU2    | ATF3          | UBC          | BDH1    | MTMR9   | SYNJ2         | PIPOX               | FDXR        |
| 112 | NEU1    | ETHE1         | ATP5PO       | BDH2    | NCOA1   | TBL1X         | KCNK3               | PLD4        |
| 113 | ACER2   | ECH1          | PRDX3        | BMX     | NCOA2   | TBL1XR1       | SARDH               | GS          |
| 114 | UGCG    | CBS           | DBT          | CARM1   | NCOA3   | TBXAS1        | KCNK9               | CAMK2D      |
| 115 | DEGS2   | GUSB          | NDUFS3       | CAV1    | NCOA6   | TECR          | VDAC1               | TM7SF2      |
| 116 | ARSA    | FASN          | NKIRAS<br>1  | CBR4    | NCOR1   | TECRL         | CYP3A7-C<br>YP3A51P | NSDHL       |
| 117 | SPHK1   | LGALS3        | RAB34        | CCNC    | NCOR2   | TGS1          | GNMT                | SOAT2       |
| 118 | SGPL1   | ATF5          | CIDEA        | CDK19   | NFYA    | THEM4         | IRS1                | UGT2B7      |
| 119 | NEU3    | ANXA5         | UQCRQ        | CDK8    | NFYB    | THEM5         | KCNJ5               | SCARB1      |
| 120 | SMPD4   | TP53INP1      | PEX14        | CEPT1   | NFYC    | THRAP3        | VDAC2               | CHCHD1<br>0 |
| 121 | SGMS1   | GSTM2         | BCL6         | CERS1   | NPAS2   | THRSP         | DGKK                | AK2         |
| 122 | ACER3   | AVPR1A        | COX6A1       | CERS2   | NR1D1   | TIAM2         | IRS2                | APOE        |
| 123 | CERK    | PLSCR1        | DNAJB9       | CERS3   | NR1H2   | TMEM86<br>B   | ATP1A1              | CA6         |
| 124 | SMPD2   | CLU           | MAP4K3       | CERS4   | NR1H3   | TNFAIP8       | VDAC3               | HCCS        |
| 125 | ENPP7   | ERRF1         | ANGPT1       | CERS5   | NR1H4   | TNFAIP8<br>L1 | IRS4                | EPHX1       |
| 126 | DEGS1   | TRIB3         | UBQLN1       | CERS6   | NRF1    | TNFAIP8<br>L2 | ATP1A2              | DLST        |
| 127 | SGPP1   | CXCL16        | NDUFB7       | CERT1   | NUDT19  | TNFAIP8<br>L3 | CTH                 | FABP9       |
| 128 | NEU4    | TNFRSF12<br>A | SLC19A<br>1  | CGA     | NUDT7   | TNFRSF2<br>1  | ATP1A3              | FADS1       |
| 129 | ACER1   | ACTG1         | ABC8         | CH25H   | OCRL    | TPTE          | SDS                 | FAM120B     |
| 130 | ASAH1   | JAG1          | SLC66A<br>3  | CHD9    | OLAH    | TPTE2         | B4GALT5             | FAR1        |
| 131 | SMPD1   | LGMN          | POR          | CIDEC   | ORMDL1  | TSPO          | AKT1                | PLAAT2      |
| 132 | B4GALT6 | FBXO6         | UCP2         | CLOCK   | ORMDL2  | TSPOAP1       | ATP1A4              | PLAAT3      |
| 133 | SPTLC2  | GPX8          | UQCR11       | CPNE1   | ORMDL3  | TXNRD1        | SDSL                | PLAAT4      |
| 134 | SPTLC1  | PNRC1         | ACOT8        | CPNE3   | OSBP    | UBE2I         | AKT2                | PLAAT5      |
| 135 | SMPD3   | ANTXR2        | MIX23        | CPNE6   | OSBPL10 | VAC14         | ABCD2               | PEX6        |
| 136 | KDSR    | MAL2          | ELOVL5       | CPNE7   | OSBPL1A | VAPA          | ATP1B4              | ADRB3       |
| 137 | UGT8    | CD9           | FABP1        | CPTP    | OSBPL2  | VAPB          | SRR                 | PLCB2       |
| 138 | ASAH2   | PPARG         | FABP2        | CREBBP  | OSBPL3  | VDR           | AKT3                | PLTP        |
| 139 | CPT1A   | GLDC          | HMGCL        | CROT    | OSBPL5  | ZN6F38        | ABCD4               | CALML4      |
| 140 | CPT1C   | STX5          | HSD17B<br>11 | CSNK1G2 | OSBPL6  | KLF5          | ATP1B1              | UGT2A2      |

|     |         |          |          |         |            |         |          |         |
|-----|---------|----------|----------|---------|------------|---------|----------|---------|
| 141 | ACADS   | STARD4   | MLYCD    | CSNK2A1 | OSBPL7     | TGFB1   | NPC1     | CAMK1D  |
| 142 | ACADSB  | CTNNB1   | PCBD1    | CSNK2A2 | OSBPL8     | NFKB1   | TSC1     | CAMK1G  |
| 143 | ACADL   | TMEM97   | S100A10  | CSNK2B  | OSBPL9     | CCND3   | ATP1B2   | FDFT1   |
| 144 | ACADM   | NIBAN1   | VNN1     | CTSA    | OXCT1      | EGR2    | GPX6     | SC5D    |
| 145 | CYP4A11 | PDK3     | CA2      | CUBN    | OXCT2      | PCK1    | TSC2     | LIPA    |
| 146 | ACAT2   | PLAUR    | HSD17B10 | CYP1A2  | PCCA       | WNT1    | NPC2     | CRAT    |
| 147 | ACADVL  | SEMA3B   | ALDH1A1  | CYP24A1 | PCCB       | CDK4    | GPX7     | NCAPH2  |
| 148 | ACAT1   | GNAI1    | HSD17B4  | CYP27A1 | PCTP       | KLF4    | RHEB     | FABP3   |
| 149 | ACAA2   | ABCA2    | CA4      | CYP2C19 | PDCD6-AHRR | ADIRF   | CAC1G    | PLA2G4F |
| 150 | HADH    | ATXN2    | PTS      | CYP2C8  | PECR       | EBF1    | MTOR     | OXSM    |
| 151 | HADHB   | NFIL3    | MAOA     | CYP2C9  | PEX11A     | WNT10B  | CAC1H    | CALML6  |
| 152 | HADHA   | ALCAM    | HAO2     | CYP2D6  | PI4K2A     | CEBPB   | RHOA     | GBE1    |
| 153 | CYP4A22 | FABP5    | MCEE     | CYP2E1  | PI4K2B     | RELA    | CAC1I    | BPHL    |
| 154 | ADH7    | S100A11  | AUH      | CYP2J2  | PI4KA      | ZNF467  | PDE3B    | FABP6   |
| 155 | ADH6    | CPEB2    | HPGD     | CYP2R1  | PI4KB      | SLC2A4  | CAC1C    | PLA2R1  |
| 156 | ACSL6   | FABP4    | FH       | CYP2U1  | PIAS4      | NR2F2   | ABCG5    | PGAM1   |
| 157 | ADH1B   | ADIPOQ   | HMGCS2   | CYP39A1 | PIK3C2A    | TNF     | GPX5     | GI2     |
| 158 | ADH1C   | LIPE     | ALAD     | CYP46A1 | PIK3C2B    | CEBPD   | ARF6     | CAVIN2  |
| 159 | ADH4    | CD36     | CBR1     | CYP4F11 | PIK3C2G    | CEBPA   | CAC1D    | ODC1    |
| 160 | ECHS1   | ADIPOR2  | GRHPR    | CYP4F2  | PIK3C3     | CYP4F12 | ABCG8    | FABP7   |
| 161 | ADH5    | ETFB     | ACOT2    | CYP4F22 | PIK3CA     | CYP2B6  | PLCG1    | PLAAT1  |
| 162 | ACSL5   | IDH1     | G0S2     | CYP4F3  | PIK3CB     | CYP2F1  | CAC1F    | KITLG   |
| 163 | ADH1A   | SORBS1   | HSP90AA1 | CYP4F8  | PIK3CD     | CYP2A13 | PLCG2    | CALML5  |
| 164 | EHHADH  | UCK1     | BCKDHB   | CYP8B1  | PIK3CG     | CYP2A7  | CAC1S    | HSD17B7 |
| 165 | GCDH    | SCP2     | UROS     | DBI     | PIK3R1     | SHMT2   | APOC3    | MSMO1   |
| 166 | ACOX3   | DECR1    | YWHAH    | DDHD1   | PIK3R2     | EGF     | IGH      | TOB1    |
| 167 | ACSL1   | CDKN2C   | LDHA     | DDHD2   | PIK3R3     | PEX16   | NUDT12   | PSME1   |
| 168 | ACAA1   | TALDO1   | CRYZ     | DECR2   | PIK3R4     | TSHB    | ADORA1   | FAAH2   |
| 169 | CPT2    | TST      | RDH16    | DGAT2L6 | PIK3R5     | SHMT1   | ORAI1    | PLA2G4C |
| 170 | CPT1B   | MCCC1    | INMT     | DPEP1   | PIK3R6     | PDGFA   | APOA4    | ADRB2   |
| 171 | ACOX1   | PGM1     | UGDH     | DPEP2   | PIKFYVE    | PEX3    | FCER1A   | SYK     |
| 172 | ECI2    | REEP5    | GSTZ1    | DPEP3   | PIP4K2A    | AGTR1   | CALML3   | GRPEL1  |
| 173 | ECI1    | BCL2L13  | IDH3B    | ELOVL1  | PIP4K2B    | AGXT    | PNLIPRP3 | PPARA   |
| 174 | ACSL3   | SLC25A10 | MDH1     | ELOVL2  | PIP4K2C    | PDGFB   | MS4A2    | FABP12  |
| 175 | ACSL4   | ME1      | ETFDH    | ELOVL3  | PIP4P1     | PEX19   | NPY      | PLA2G4D |
| 176 | SOAT1   | PHYH     | SDHD     | ELOVL4  | PIP5K1A    | TSHR    | CALM2    | PLCB1   |

|     |         |         |         |        |         |       |        |         |
|-----|---------|---------|---------|--------|---------|-------|--------|---------|
| 177 | LSS     | PIM3    | HSDL2   | ELOVL7 | PIP5K1B | GQ    | PSAPL1 | GI3     |
| 178 | SQLE    | YWHAG   | CD1D    | EP300  | PIP5K1C | PDGFC | FCER1G | DHCR24  |
| 179 | EBP     | NDUFAB1 | ALDH3A1 | ESYT2  | PITPNB  | ABCD3 | NPY1R  | SLC25A1 |
| 180 | CYP51A1 | ADIG    | SLC22A5 | ESYT3  | PITPNM1 | ADRB1 | CALM3  | NBN     |
| 181 | DHCR7   | QDPR    | PDHB    | ETNPPL | PITPNM2 | G11   | FYN    | FAAH    |
| 182 | CYP27B1 | CS      | TDO2    | FA2H   | PITPNM3 | PDGFD | GI1    | PLA1A   |
| 183 | PEX1    | CALM1   |         |        |         |       |        |         |

**Table S4.** Univariate analysis of lipid metabolism relative genes in survival of UCEC patients

| id         | HR    | HR.95L | HR.95H | pvalue |
|------------|-------|--------|--------|--------|
| L1CAM      | 1.285 | 1.167  | 1.415  | 0.000  |
| B4GALNT3   | 0.651 | 0.551  | 0.768  | 0.000  |
| SCGB2A1    | 0.845 | 0.791  | 0.902  | 0.000  |
| KIAA1324   | 0.819 | 0.756  | 0.887  | 0.000  |
| PLPP2      | 0.727 | 0.637  | 0.830  | 0.000  |
| PGR        | 0.735 | 0.645  | 0.838  | 0.000  |
| TRPM4      | 0.659 | 0.549  | 0.790  | 0.000  |
| ESR1       | 0.766 | 0.682  | 0.860  | 0.000  |
| CDKN2A     | 1.290 | 1.153  | 1.444  | 0.000  |
| UBXN10-AS1 | 0.644 | 0.530  | 0.783  | 0.000  |
| KCNK6      | 0.630 | 0.513  | 0.774  | 0.000  |
| GRB7       | 1.356 | 1.183  | 1.555  | 0.000  |
| SLC47A1    | 0.757 | 0.667  | 0.858  | 0.000  |
| SLC25A35   | 0.698 | 0.592  | 0.823  | 0.000  |
| PNOC       | 1.282 | 1.144  | 1.437  | 0.000  |
| SPDEF      | 0.840 | 0.775  | 0.910  | 0.000  |
| FAM189A2   | 0.652 | 0.535  | 0.795  | 0.000  |
| MSX1       | 0.857 | 0.797  | 0.920  | 0.000  |
| MAL        | 1.190 | 1.096  | 1.292  | 0.000  |
| ZDHHC1     | 0.604 | 0.476  | 0.767  | 0.000  |
| AC026336.3 | 0.744 | 0.647  | 0.857  | 0.000  |
| IHH        | 0.814 | 0.738  | 0.898  | 0.000  |
| SERINC2    | 0.748 | 0.649  | 0.862  | 0.000  |
| CLDN16     | 1.296 | 1.142  | 1.470  | 0.000  |
| ARHGAP29   | 1.495 | 1.227  | 1.820  | 0.000  |
| IL20RA     | 0.696 | 0.582  | 0.832  | 0.000  |
| VIM        | 0.739 | 0.636  | 0.859  | 0.000  |
| SLC38A1    | 1.470 | 1.214  | 1.780  | 0.000  |
| TUBB4A     | 1.296 | 1.139  | 1.474  | 0.000  |
| CLDN6      | 1.145 | 1.069  | 1.225  | 0.000  |



|            |       |       |       |       |
|------------|-------|-------|-------|-------|
| SST        | 1.133 | 1.063 | 1.206 | 0.000 |
| ECEL1P2    | 0.599 | 0.461 | 0.777 | 0.000 |
| ATP2C2     | 0.658 | 0.531 | 0.815 | 0.000 |
| KLK6       | 1.200 | 1.093 | 1.318 | 0.000 |
| SPATA18    | 0.721 | 0.610 | 0.854 | 0.000 |
| MLPH       | 0.797 | 0.708 | 0.898 | 0.000 |
| TPX2       | 1.555 | 1.232 | 1.962 | 0.000 |
| UCHL1      | 1.173 | 1.078 | 1.277 | 0.000 |
| ANO1       | 0.771 | 0.672 | 0.885 | 0.000 |
| DACT2      | 0.790 | 0.696 | 0.897 | 0.000 |
| FOXA2      | 0.812 | 0.725 | 0.909 | 0.000 |
| SCGB1D2    | 0.858 | 0.789 | 0.933 | 0.000 |
| AC084866.1 | 0.835 | 0.756 | 0.922 | 0.000 |
| ASRGL1     | 0.804 | 0.713 | 0.908 | 0.000 |
| BMPR1B-DT  | 0.842 | 0.765 | 0.927 | 0.000 |
| LRRC26     | 0.726 | 0.608 | 0.868 | 0.000 |
| SOX17      | 0.829 | 0.746 | 0.922 | 0.001 |
| MLF1       | 1.281 | 1.112 | 1.475 | 0.001 |
| LPCAT2     | 0.655 | 0.514 | 0.834 | 0.001 |
| CAPS       | 0.843 | 0.765 | 0.930 | 0.001 |
| CDKN1A     | 0.763 | 0.652 | 0.891 | 0.001 |
| BEX2       | 1.300 | 1.117 | 1.514 | 0.001 |
| TJP3       | 0.743 | 0.625 | 0.882 | 0.001 |
| CITED4     | 0.779 | 0.674 | 0.900 | 0.001 |
| CPVL       | 1.296 | 1.114 | 1.506 | 0.001 |
| TFF3       | 0.900 | 0.847 | 0.958 | 0.001 |
| FBLN1      | 0.826 | 0.737 | 0.924 | 0.001 |
| KIF1A      | 1.229 | 1.088 | 1.388 | 0.001 |
| SAT1       | 0.739 | 0.619 | 0.884 | 0.001 |
| GLDC       | 1.243 | 1.092 | 1.415 | 0.001 |
| SRARP      | 0.638 | 0.487 | 0.837 | 0.001 |
| ANG        | 0.726 | 0.598 | 0.882 | 0.001 |
| AC013724.1 | 0.690 | 0.549 | 0.866 | 0.001 |
| HERC5      | 1.343 | 1.120 | 1.609 | 0.001 |
| ACSL5      | 0.810 | 0.711 | 0.923 | 0.002 |
| FBXO17     | 1.288 | 1.100 | 1.507 | 0.002 |
| KLK7       | 1.184 | 1.066 | 1.316 | 0.002 |
| PSAT1      | 1.312 | 1.107 | 1.555 | 0.002 |
| TEKT4      | 0.701 | 0.561 | 0.875 | 0.002 |
| CLDN1      | 1.220 | 1.077 | 1.382 | 0.002 |
| AURKA      | 1.470 | 1.153 | 1.875 | 0.002 |
| AL354766.2 | 0.734 | 0.603 | 0.893 | 0.002 |
| AC025154.2 | 0.782 | 0.669 | 0.914 | 0.002 |

|           |       |       |       |       |
|-----------|-------|-------|-------|-------|
| C9orf152  | 0.782 | 0.667 | 0.915 | 0.002 |
| KLHL24    | 1.544 | 1.168 | 2.042 | 0.002 |
| EYA2      | 0.867 | 0.791 | 0.950 | 0.002 |
| SERPINA6  | 0.784 | 0.670 | 0.917 | 0.002 |
| ARL4D     | 0.801 | 0.693 | 0.925 | 0.003 |
| LRRC46    | 0.796 | 0.686 | 0.924 | 0.003 |
| RSAD2     | 1.294 | 1.094 | 1.530 | 0.003 |
| FOXJ1     | 0.837 | 0.744 | 0.940 | 0.003 |
| DNAJC10   | 0.710 | 0.566 | 0.890 | 0.003 |
| SMIM6     | 0.818 | 0.717 | 0.934 | 0.003 |
| CDH6      | 1.237 | 1.075 | 1.423 | 0.003 |
| KIF2C     | 1.443 | 1.130 | 1.843 | 0.003 |
| LINC01480 | 0.826 | 0.727 | 0.939 | 0.003 |
| APLP1     | 1.219 | 1.067 | 1.391 | 0.003 |
| NAPSB     | 0.855 | 0.769 | 0.950 | 0.004 |
| AQP5      | 0.870 | 0.793 | 0.955 | 0.004 |
| DNAAF1    | 0.722 | 0.580 | 0.899 | 0.004 |
| C1orf194  | 0.846 | 0.755 | 0.947 | 0.004 |
| MSX2      | 0.846 | 0.755 | 0.948 | 0.004 |
| TEKT1     | 0.786 | 0.666 | 0.927 | 0.004 |
| UPK1B     | 0.869 | 0.789 | 0.957 | 0.004 |
| TPD52     | 1.522 | 1.142 | 2.030 | 0.004 |
| H19       | 1.135 | 1.041 | 1.239 | 0.004 |
| KIRREL1   | 1.349 | 1.098 | 1.657 | 0.004 |
| PEG10     | 1.169 | 1.049 | 1.302 | 0.005 |
| ANXA1     | 0.818 | 0.712 | 0.940 | 0.005 |
| HOXA5     | 1.185 | 1.053 | 1.333 | 0.005 |
| MANSC1    | 0.715 | 0.566 | 0.903 | 0.005 |
| NT5E      | 0.823 | 0.718 | 0.944 | 0.005 |
| AK4       | 1.361 | 1.095 | 1.692 | 0.005 |
| WNT7A     | 1.141 | 1.039 | 1.253 | 0.006 |
| FAM166B   | 0.830 | 0.728 | 0.947 | 0.006 |
| SFN       | 0.847 | 0.753 | 0.953 | 0.006 |
| SLC43A1   | 0.810 | 0.698 | 0.941 | 0.006 |
| PLA2G4A   | 0.820 | 0.711 | 0.945 | 0.006 |
| CFAP73    | 0.788 | 0.665 | 0.934 | 0.006 |
| SMC4      | 1.379 | 1.093 | 1.739 | 0.007 |
| SERPINA4  | 0.743 | 0.600 | 0.921 | 0.007 |
| SYT13     | 1.264 | 1.067 | 1.498 | 0.007 |
| PIGR      | 0.917 | 0.861 | 0.977 | 0.007 |
| FBP1      | 0.803 | 0.684 | 0.943 | 0.007 |
| LINC00261 | 0.823 | 0.714 | 0.949 | 0.007 |
| C4BPA     | 0.841 | 0.740 | 0.955 | 0.008 |

|             |       |       |       |       |
|-------------|-------|-------|-------|-------|
| PKDCC       | 0.842 | 0.741 | 0.956 | 0.008 |
| ZNF146      | 1.486 | 1.107 | 1.993 | 0.008 |
| GAD1        | 0.789 | 0.661 | 0.941 | 0.008 |
| CCNE1       | 1.237 | 1.056 | 1.449 | 0.008 |
| DPM1        | 1.504 | 1.110 | 2.038 | 0.008 |
| MAT2A       | 1.460 | 1.098 | 1.942 | 0.009 |
| SFRP4       | 0.872 | 0.786 | 0.967 | 0.009 |
| CREB3L1     | 0.860 | 0.768 | 0.964 | 0.009 |
| GLYATL2     | 0.868 | 0.780 | 0.966 | 0.010 |
| NAMPT       | 1.423 | 1.090 | 1.857 | 0.010 |
| RNF183      | 0.798 | 0.673 | 0.947 | 0.010 |
| MAGEH1      | 1.275 | 1.060 | 1.534 | 0.010 |
| LRRC71      | 0.784 | 0.652 | 0.943 | 0.010 |
| C9orf24     | 0.866 | 0.777 | 0.966 | 0.010 |
| CDHR4       | 0.828 | 0.717 | 0.956 | 0.010 |
| SELENOP     | 1.289 | 1.062 | 1.565 | 0.010 |
| RSPH1       | 0.833 | 0.724 | 0.958 | 0.010 |
| TESC        | 0.844 | 0.741 | 0.962 | 0.011 |
| TNNT1       | 1.130 | 1.028 | 1.241 | 0.011 |
| STK26       | 1.316 | 1.064 | 1.628 | 0.011 |
| MORN5       | 0.844 | 0.740 | 0.962 | 0.011 |
| PAM         | 0.808 | 0.686 | 0.953 | 0.011 |
| ITM2C       | 1.171 | 1.036 | 1.324 | 0.012 |
| TMEM101     | 0.876 | 0.790 | 0.971 | 0.012 |
| EDN3        | 0.845 | 0.740 | 0.964 | 0.012 |
| HGD         | 0.854 | 0.755 | 0.966 | 0.012 |
| STAP2       | 0.802 | 0.675 | 0.954 | 0.012 |
| SERINC5     | 0.770 | 0.627 | 0.945 | 0.012 |
| WDR38       | 0.860 | 0.764 | 0.968 | 0.013 |
| VWA3A       | 0.786 | 0.650 | 0.951 | 0.013 |
| SCGB1D4     | 0.837 | 0.727 | 0.964 | 0.014 |
| FAM92B      | 0.824 | 0.706 | 0.962 | 0.014 |
| ANKRD44-AS1 | 0.836 | 0.725 | 0.965 | 0.014 |
| S100A1      | 1.134 | 1.025 | 1.255 | 0.014 |
| HENMT1      | 1.262 | 1.047 | 1.520 | 0.014 |
| ZMYND10     | 0.850 | 0.745 | 0.969 | 0.015 |
| ATP5F1D     | 0.751 | 0.595 | 0.947 | 0.015 |
| OVGP1       | 0.869 | 0.775 | 0.974 | 0.015 |
| SP3         | 1.537 | 1.084 | 2.179 | 0.016 |
| PCSK1N      | 1.138 | 1.024 | 1.265 | 0.016 |
| PIK3CA      | 1.447 | 1.071 | 1.955 | 0.016 |
| ENPP3       | 0.823 | 0.703 | 0.965 | 0.016 |
| TCEA1       | 1.439 | 1.069 | 1.938 | 0.017 |

|            |       |       |       |       |
|------------|-------|-------|-------|-------|
| C20orf85   | 0.909 | 0.840 | 0.983 | 0.017 |
| IFIT1      | 1.167 | 1.028 | 1.326 | 0.017 |
| SRGAP3-AS2 | 0.808 | 0.677 | 0.963 | 0.018 |
| EGFL6      | 1.183 | 1.029 | 1.359 | 0.018 |
| PRELID3B   | 1.488 | 1.071 | 2.067 | 0.018 |
| CCNO       | 0.842 | 0.730 | 0.972 | 0.019 |
| AKIRIN1    | 1.398 | 1.057 | 1.848 | 0.019 |
| HAT1       | 1.534 | 1.072 | 2.196 | 0.019 |
| PDCD10     | 1.428 | 1.054 | 1.936 | 0.021 |
| SLC2A1     | 1.236 | 1.032 | 1.481 | 0.022 |
| HMGA1      | 1.250 | 1.033 | 1.512 | 0.022 |
| AL357093.2 | 0.862 | 0.759 | 0.979 | 0.022 |
| FAM183A    | 0.882 | 0.792 | 0.982 | 0.022 |
| PHF6       | 1.451 | 1.054 | 1.997 | 0.022 |
| DEK        | 1.309 | 1.038 | 1.652 | 0.023 |
| ROPN1L     | 0.866 | 0.765 | 0.981 | 0.024 |
| TPPP3      | 0.892 | 0.807 | 0.985 | 0.024 |
| RAD21      | 1.348 | 1.039 | 1.749 | 0.025 |
| SNCG       | 1.143 | 1.017 | 1.283 | 0.025 |
| CFAP45     | 0.855 | 0.745 | 0.980 | 0.025 |
| NPDC1      | 0.842 | 0.723 | 0.979 | 0.025 |
| PREPL      | 1.493 | 1.050 | 2.123 | 0.026 |
| TUBA4B     | 0.863 | 0.759 | 0.982 | 0.026 |
| HMGA2      | 1.210 | 1.023 | 1.431 | 0.026 |
| MPZL2      | 0.799 | 0.655 | 0.974 | 0.027 |
| NAA50      | 1.420 | 1.041 | 1.937 | 0.027 |
| SSB        | 1.385 | 1.038 | 1.849 | 0.027 |
| HSPB1      | 0.814 | 0.678 | 0.978 | 0.028 |
| FAM91A1    | 1.402 | 1.037 | 1.896 | 0.028 |
| LANCL1     | 1.452 | 1.041 | 2.026 | 0.028 |
| HLTF       | 1.335 | 1.031 | 1.730 | 0.029 |
| NUP153     | 1.390 | 1.035 | 1.866 | 0.029 |
| SCX        | 1.156 | 1.015 | 1.316 | 0.029 |
| SNX4       | 1.518 | 1.042 | 2.213 | 0.030 |
| AC023300.2 | 0.863 | 0.756 | 0.986 | 0.030 |
| ECT2       | 1.251 | 1.019 | 1.535 | 0.033 |
| PHYHD1     | 0.873 | 0.770 | 0.990 | 0.035 |
| ACADM      | 1.340 | 1.018 | 1.764 | 0.037 |
| PIK3R1     | 0.840 | 0.712 | 0.990 | 0.037 |
| SNHG25     | 0.863 | 0.750 | 0.993 | 0.039 |
| IGF2BP2    | 1.133 | 1.006 | 1.277 | 0.040 |
| RPL41P1    | 1.062 | 1.002 | 1.126 | 0.041 |
| PAIP1      | 1.393 | 1.013 | 1.915 | 0.042 |

|          |       |       |       |       |
|----------|-------|-------|-------|-------|
| PPP1R15B | 1.375 | 1.012 | 1.868 | 0.042 |
| IGHA1    | 0.926 | 0.860 | 0.997 | 0.042 |
| PCNP     | 1.397 | 1.010 | 1.931 | 0.043 |
| PRKAA1   | 1.418 | 1.007 | 1.998 | 0.046 |
| FBXO2    | 1.130 | 1.002 | 1.275 | 0.046 |
| CYP4X1   | 0.856 | 0.734 | 0.998 | 0.047 |
| NRAS     | 1.370 | 1.004 | 1.870 | 0.047 |
| TMPRSS13 | 0.839 | 0.704 | 0.999 | 0.049 |
| GASK1B   | 0.820 | 0.673 | 0.999 | 0.049 |
